# Supplementary material
Source: PubMed Central journal article supplement (PMC7323849)
Supplement: NIHMS1598794-supplement-1.pdf [file NIHMS1598794-supplement-1.pdf]

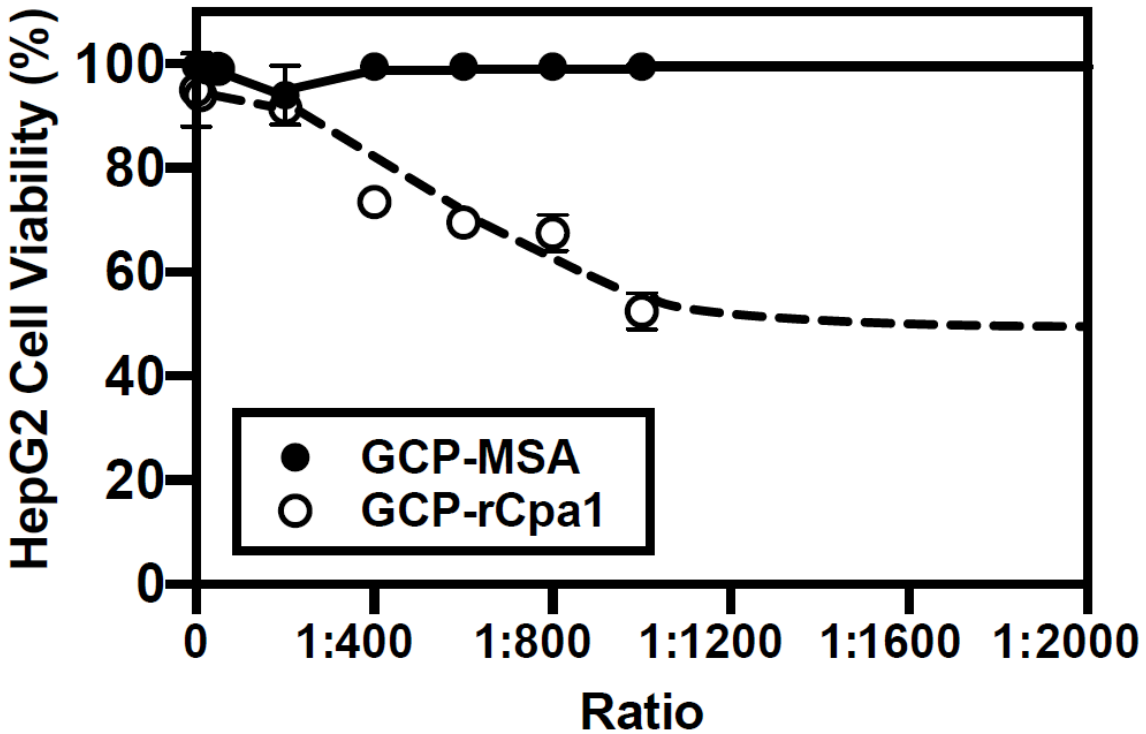

**(HepG2 cells: GCP-MSA or GCP-rCpa1 particles)**

**Supplement Fig. 1. Cytotoxicity analysis of GCP-rCpa1 vaccine.** Human hepatocellular carcinoma (Hep2G) cells (ATCC#HB-8065) were maintained in minimum essential medium (MEM) enriched with 10% FBS, 1 mM sodium pyruvate, and 1x MEM amino acid solution. Once cells reached complete confluence, cells were detached using 1x Trypsin/EDTA solution and resuspended in the enriched MEM medium at a final concentration of  $5 \times 10^5$  cells/mL and seeded 100  $\mu$ L per well in a 96-well plate. GCP-rCpa1 was added at a range of 1:1 to 1:1000 (Hep2G to particles) ratio. GCP loaded with murine serum albumin was also evaluated. The untreated Hep2G cells in culture medium was incubated with equal volume of PBS as a control of 100 % viability. All samples were in quadruplicate. Plates were incubated for 24 h at 37°C with CO<sub>2</sub> and cytotoxicity was determined using PrestoBlue cell viability assay. Viability curves were assessed using dose-response curves determined in SigmaPlot V11. CC<sub>50</sub> was defined as ratio of Hep2G cells to particles leading to 50% cell death and was calculated to be 1150 for GCP-rCpa1.

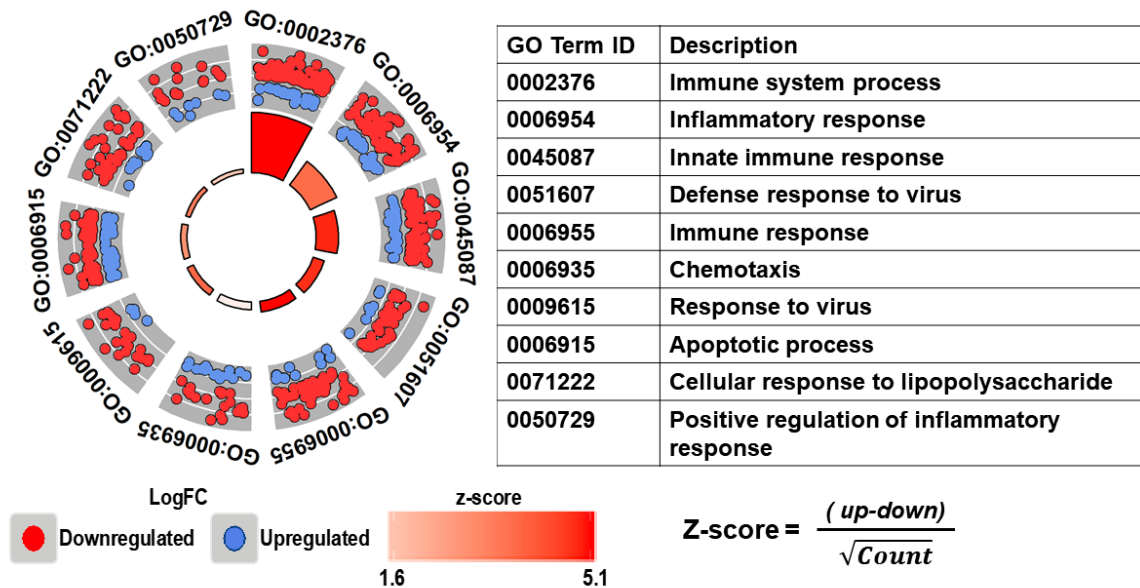

**Supplement Fig. 2. The top 10 Gene ontology (GO) terms derived from macrophages treated with GCP adjuvant.** GOCircle plot displays blue and red scatter plots in outer gray circle, representing enriched GO terms with downregulated or upregulated genes, respectively. The inner red ring corresponds to a bar plot, the height of the bar indicates the significance of the GO term (FDR *p*-Value), and the color corresponds to the z-score. The table lists the top GO term with its designated description. The inflammatory response (GO:0006954) had the greatest enriched z-score value.

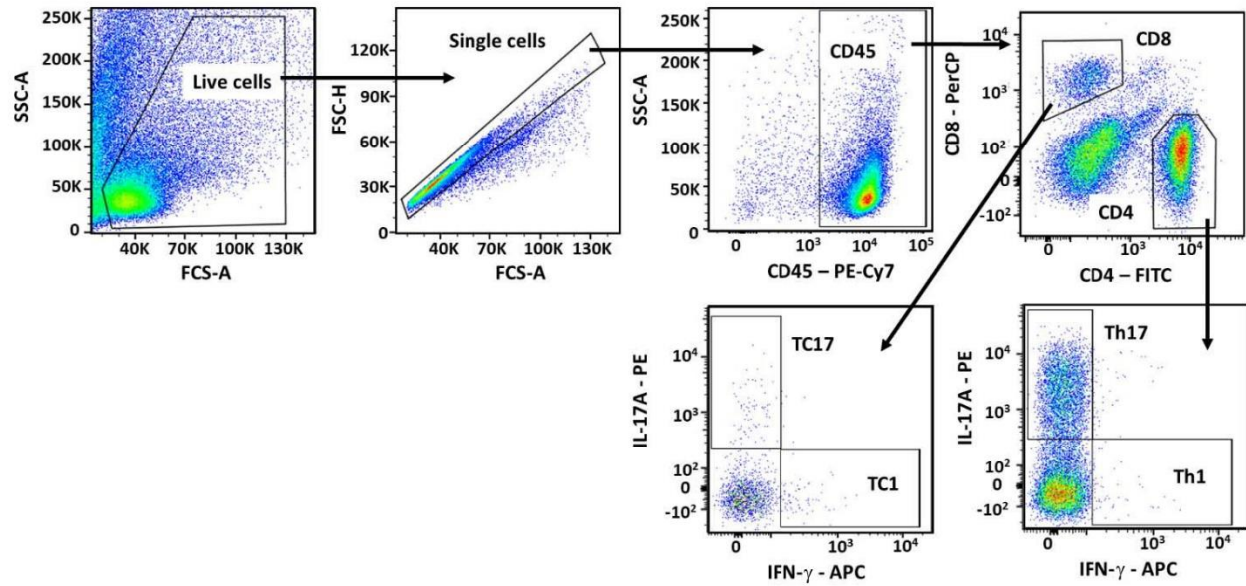

**Supplement Fig. 3. Gating strategy for Th and Tc cell subsets.** Isolated total pulmonary leukocytes from vaccinated or nonvaccinated mice were challenged with *Coccidioides* spores and analyzed by conducting fluorescence-activated cell sorting (FACS) using FACSCalibur flow cytometer. T helper CD4<sup>+</sup> T cells show the production of IL-17A and IFN- $\gamma$ . Cytotoxic CD8<sup>+</sup> T cell subsets also analyzed intracellular flow for IL-17A and IFN- $\gamma$ .
